# Supplementary material for: Core Microbiome of Medicinal Plant Salvia miltiorrhiza Seed: A Rich Reservoir of Beneficial Microbes for Secondary Metabolism?
Source: PubMed Central journal article supplement (PMC5877533; doi:10.3390/ijms19030672), 2018-02-27
Supplement: ijms-19-00672-s001.pdf [file ijms-19-00672-s001.pdf]

## Supplementary Material

Figure S1 Geographic distribution of *Salvia miltiorrhiza* seeds Sampling sites.

Figure S2 SSR cluster analysis chart of *S.miltiorrhiza* seeds from different geographic sampling sites.

Figure S3 Rarefaction curves showing the observed OTU richness (97% identity).

Figure S4 Taxonomic composition of seed-associated bacterial microbiome of *S.miltiorrhiza* at class level.

Figure S5 Taxonomic composition of seed-associated fungal microbiome of *S.miltiorrhiza* at class level.

Figure S7 Fungal community diversity statistics for *S. miltiorrhiza* seed samples.

Table S1 Sampling sources and **quality** of *S. miltiorrhiza* seeds.

Table S2 Characterization of 10 microsatellite loci List.

Table S3 SSR genetic diversity indexes.

Table S4 AMOVA results.

Table S5 Summary of sequencing and statistical data of bacterial microbiome of *S. miltiorrhiza* seeds.

Table S6 Summary of sequencing and statistical data of fungal microbiome of *S. miltiorrhiza* seeds.

Table S7 Alpha-diversity and richness estimates indices for bacterial 16S rDNA amplicon libraries of *S. miltiorrhiza* seed samples.

Table S8 Alpha-diversity and Richness estimates indices for Fungal ITS amplicon libraries of *S. miltiorrhiza* seed samples.

Table S9 Top 8 most abundant bacterial genera within core bacterial microbiome of *S. miltiorrhiza* seed.

Table S10 Top 8 most abundant fungal genera within core fungal microbiome of *S. miltiorrhiza* seed.

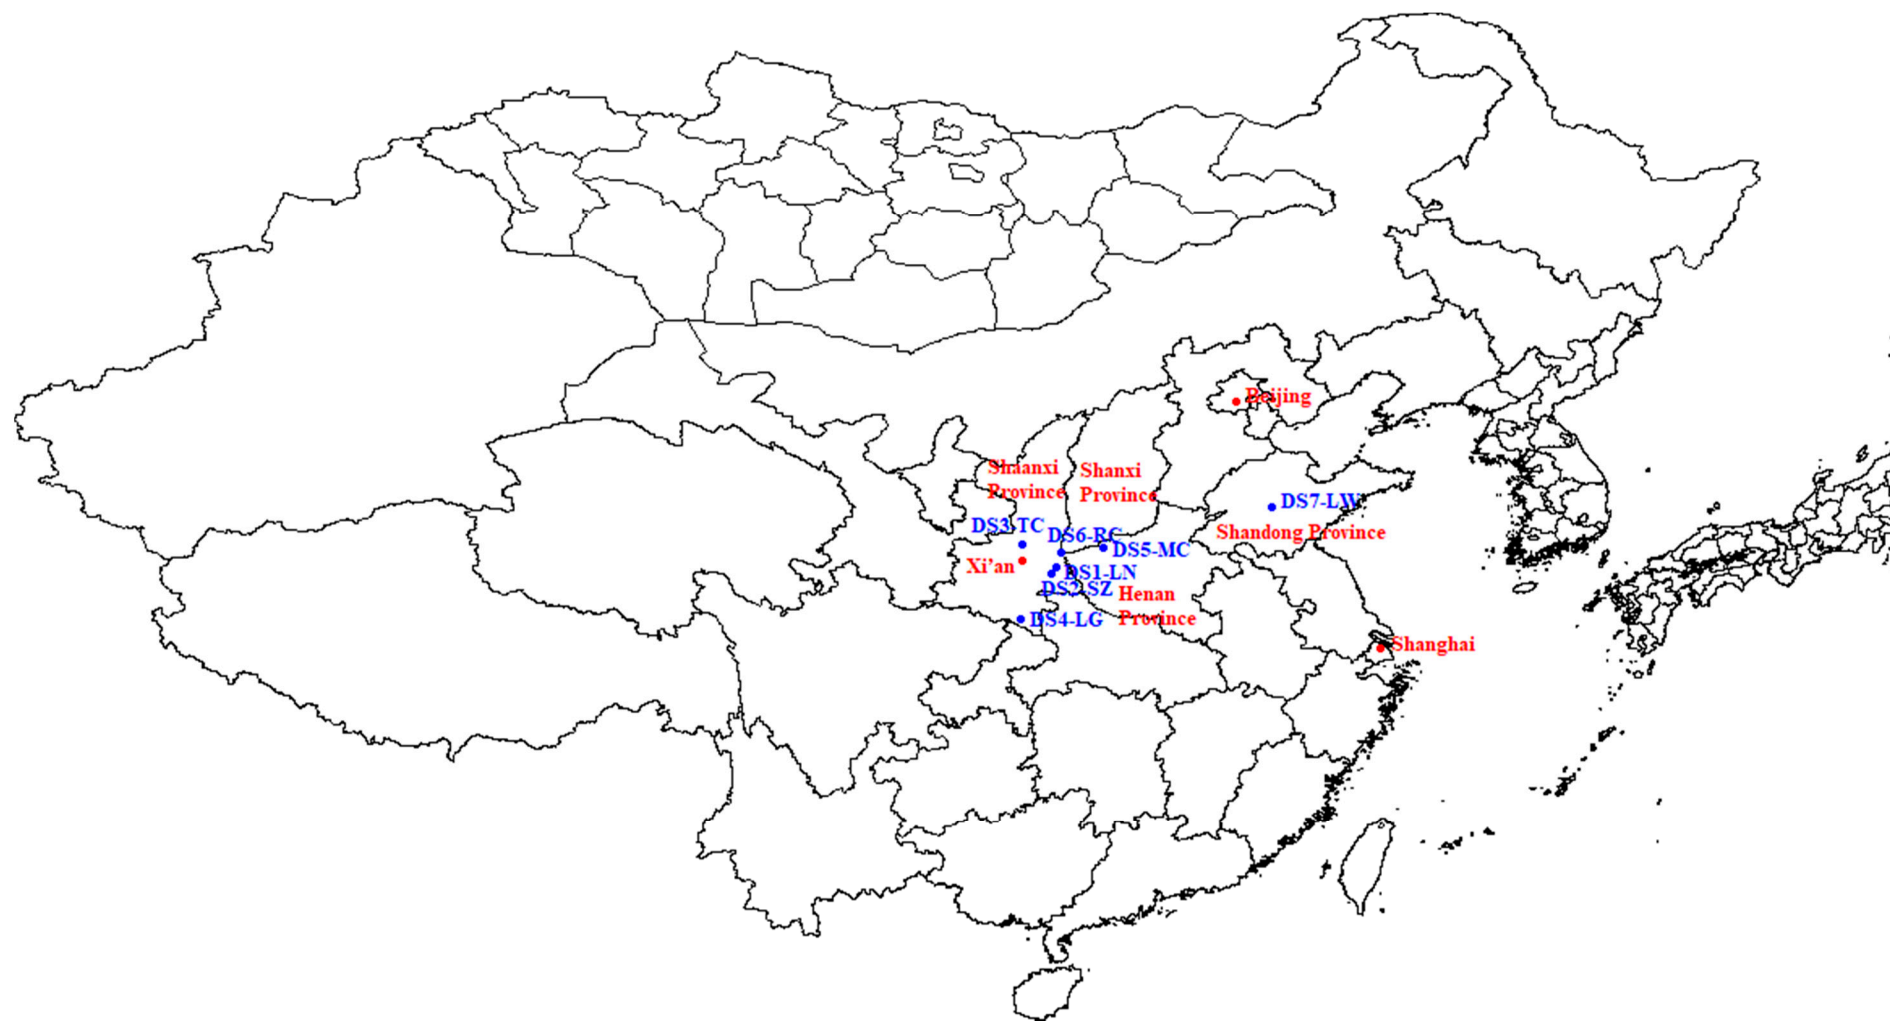

**Figure S1 Geographic distribution of *Salvia miltiorrhiza* seeds Sampling sites.**

The symbols indicates sample with their IDs and their sampling sites, DS1-LG (Luonan County, Shaanxi Province), DS2-SZ (Shangzhou District, Shaanxi Province), DS3-TC (Tongchuan City, Shaanxi Province), DS4-LG (Langao County, Shaanxi Province), DS5-MC (Mianchi County, Henan Province), DS6-RC (Ruicheng County, Shanxi Province), DS7-LW (Laiwu County, Shandong Province). This map was generated from the free website DIVA-GIS (<http://www.diva-gis.org/>) and modified by their free soft DIVA-GIS 7.5 (<http://www.diva-gis.org/download>).

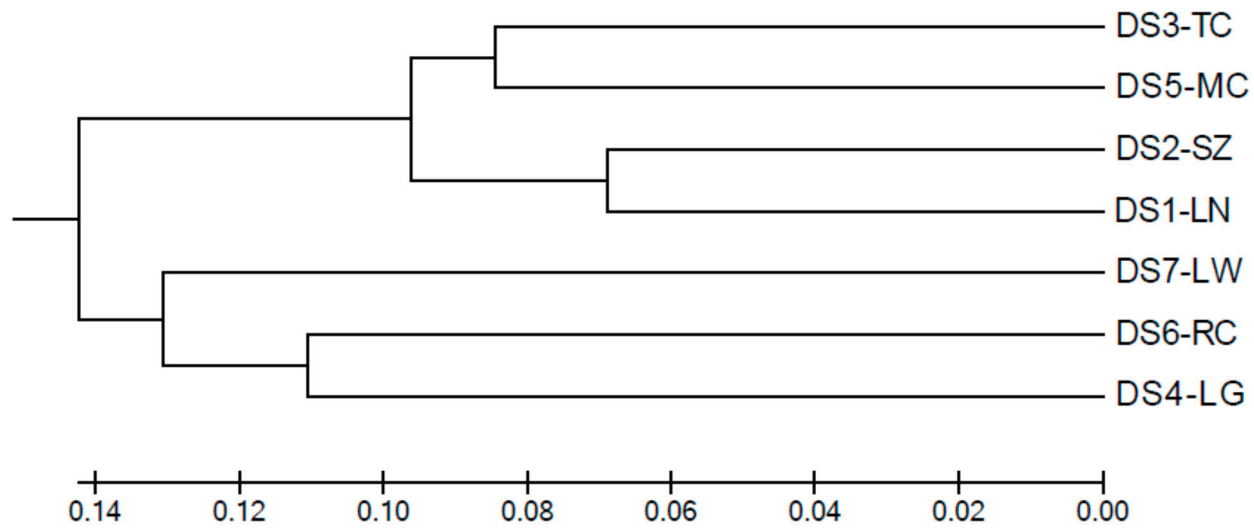

**Figure S2 SSR cluster analysis chart of *S.miltiorrhiza* seeds from different geographic sampling sites.**

DS1-LG, Luonan County, Shaanxi Province, DS2-SZ, Shangzhou District, Shaanxi Province, DS3-TC, Tongchuan City, Shaanxi Province, DS4-LG, Langao County, Shaanxi Province, DS5-MC, Mianchi County, Henan Province, DS6-RC, Ruicheng County, Shanxi Province, DS7-LW, Laiwu County, Shandong Province.

(a)

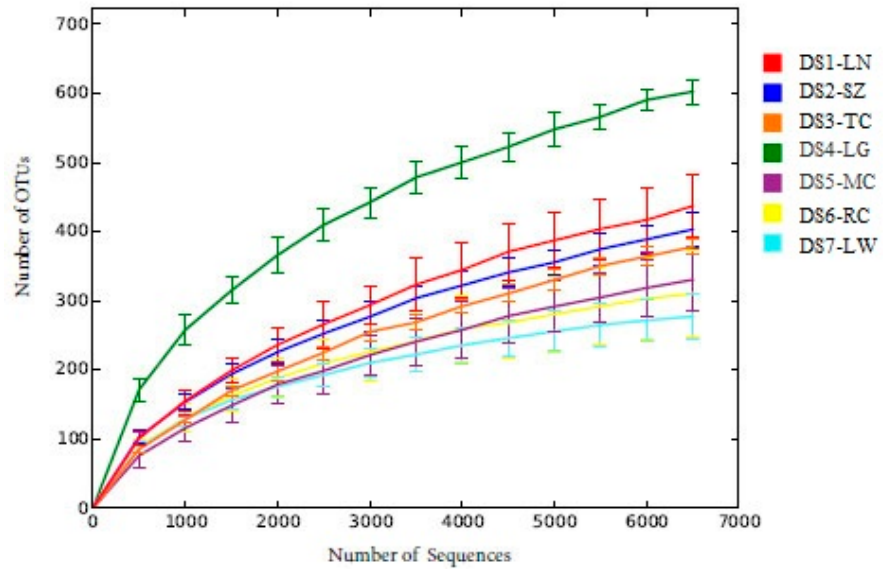

(b)

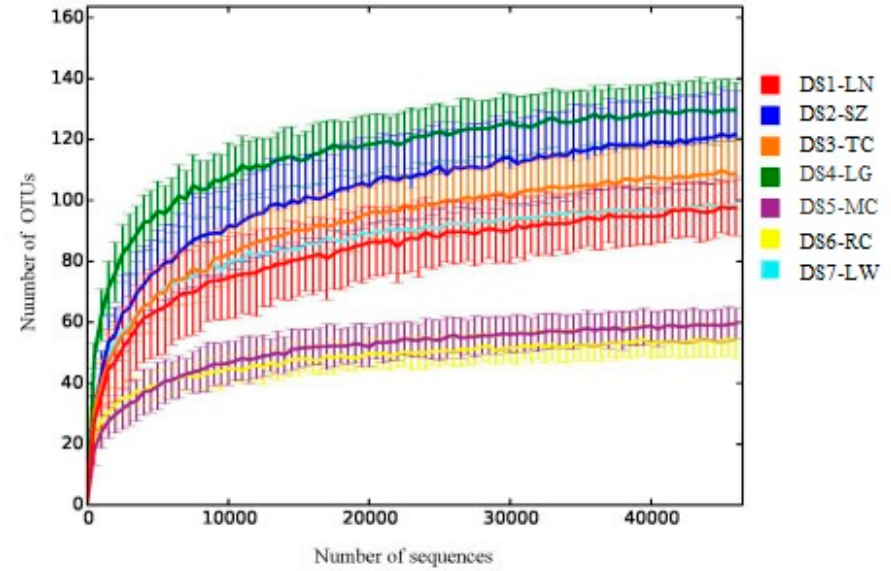

**Figure S3 Rarefaction curves showing the observed OTU richness (97% identity).**

The curves are grouped according to the sample sites. (a) Rarefaction curves for bacterial 16S rRNA gene amplicon libraries. (b) Rarefaction curves for fungal ITS2 region of small-subunit rRNA gene amplicons.

(a)

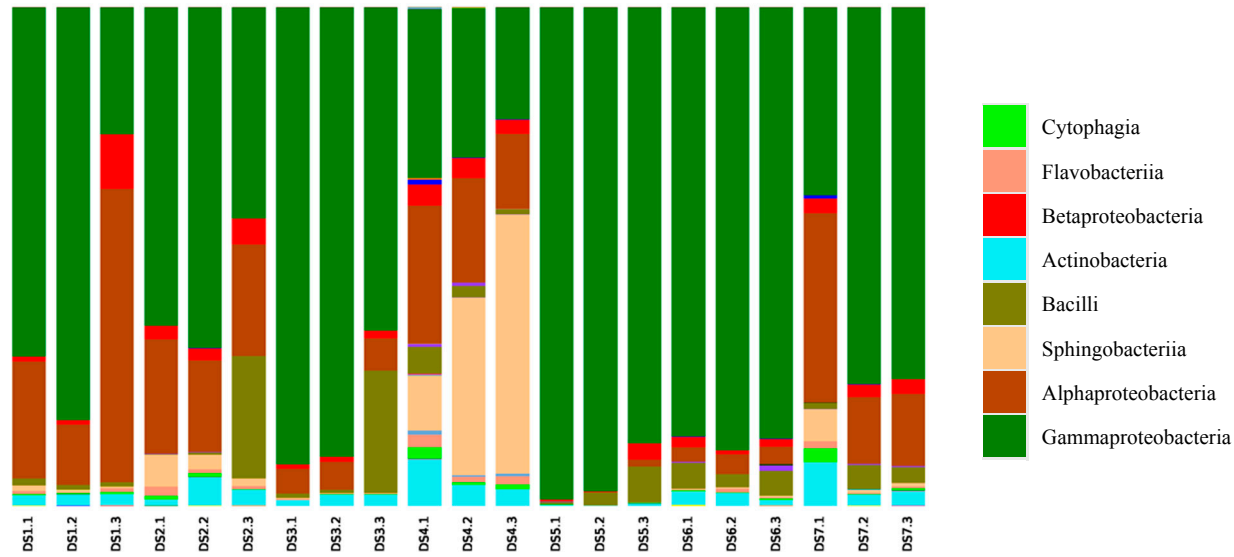

(b)

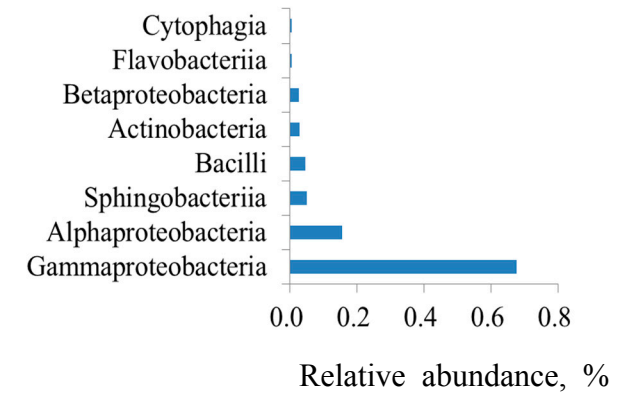

**Figure S4 Taxonomic composition of seed-associated bacterial microbiome of *S.miltiorrhiza* at class level.**

(a) Bar charts represent relative abundance of every *S.miltiorrhiza* seed samples at class level. (b) For the whole microbiome, main classes relative abundance shown as separate diagram.

(a)

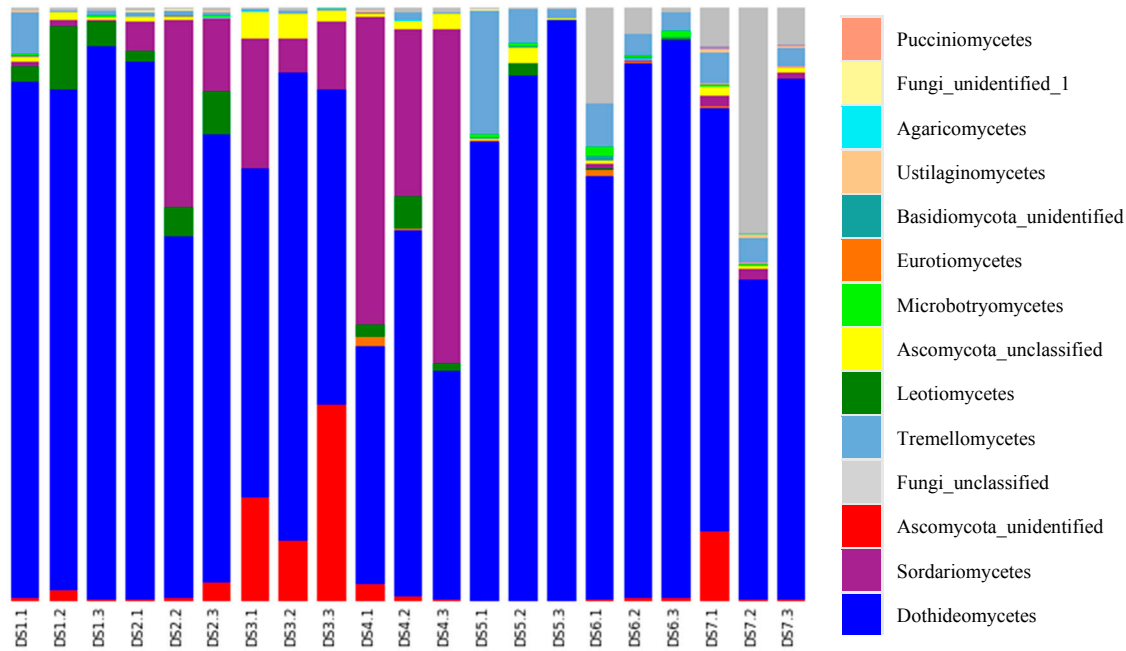

(b)

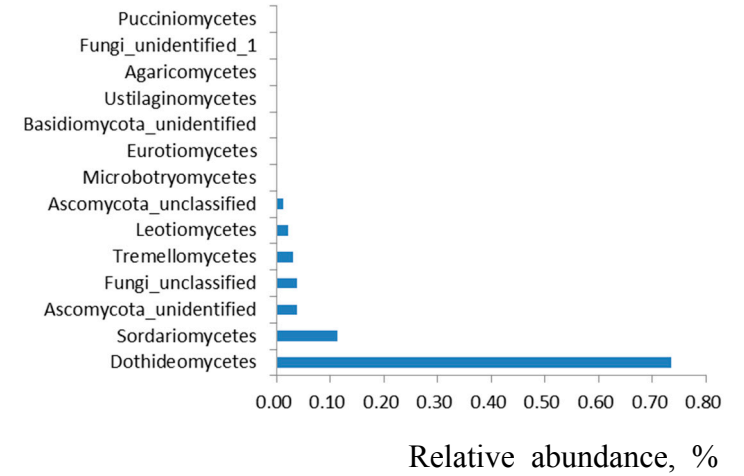

**Figure S5 Taxonomic composition of seed-associated fungal microbiome of *S.miltiorrhiza* at class level.**

(a) Bar charts represent relative abundance of every *S.miltiorrhiza* seed samples at class level. (b) For the whole microbiome, main classes relative abundance shown as separate diagram.

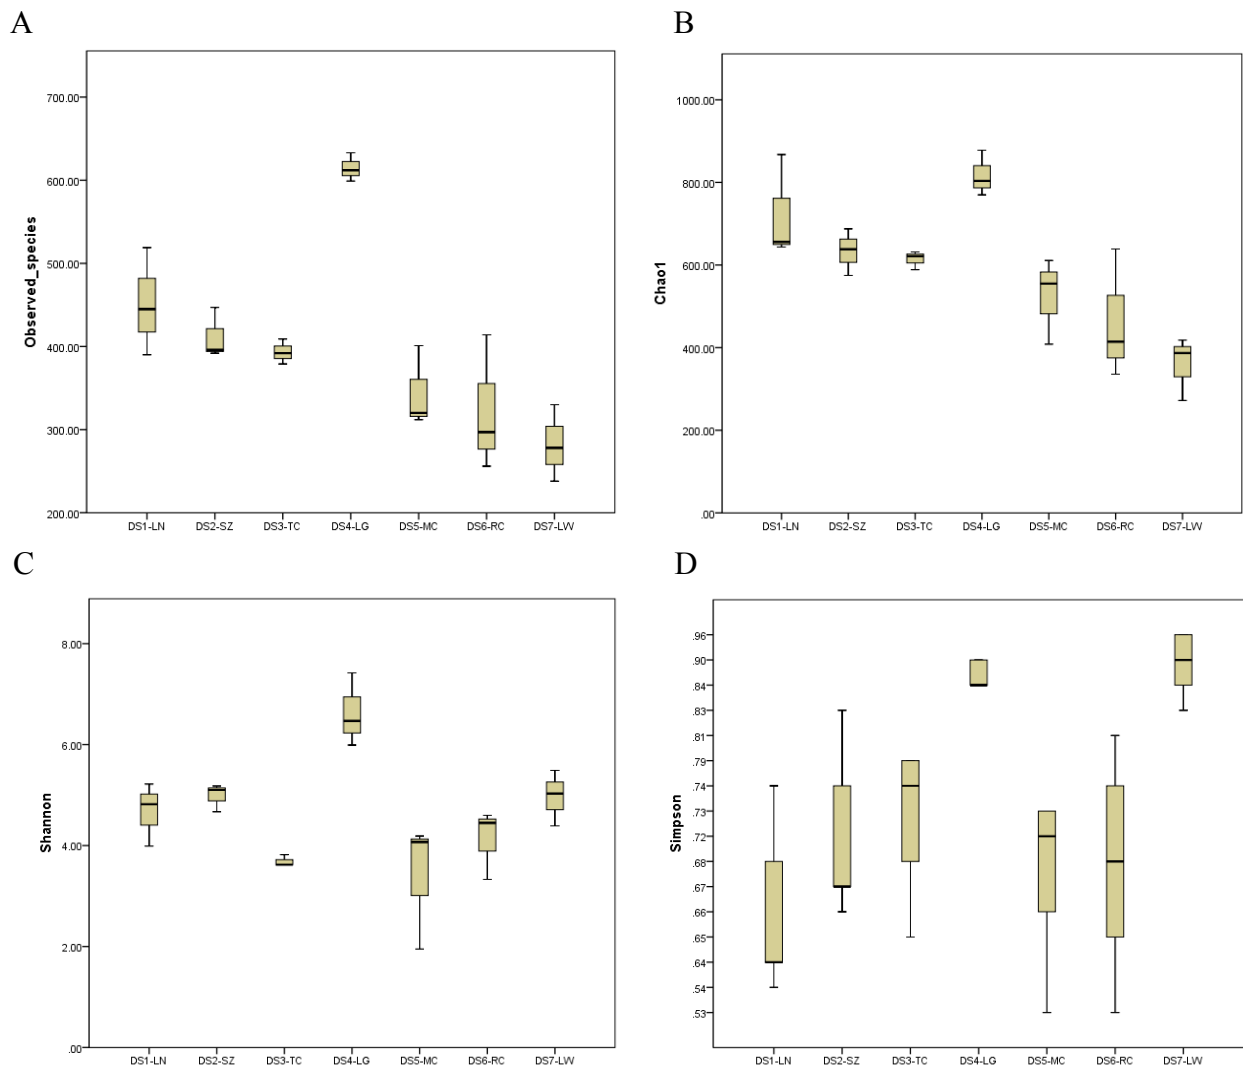

**Figure. S6 Bacterial community diversity statistics for *S. miltiorrhiza* seed samples.**

(A) Observed species. (B) Chao1 index, which indicated the bacterial community richness (expressed as the projected total number of OTU in each sample). (C) Shannon index ( $H'$ ), which is a combined measure of bacterial community richness and evenness. (D) Simpson's index, which measures bacterial community evenness. Error bars represent the 95% confidence intervals of the data. The observed species, Chao1 and Shannon diversity indicated that bacterial community richness showed significant difference between *S. miltiorrhiza* seeds samples from different geographic origins, and bacterial community evenness showed by Simpson's index also revealed some significant differences (Table S3 Supporting information).

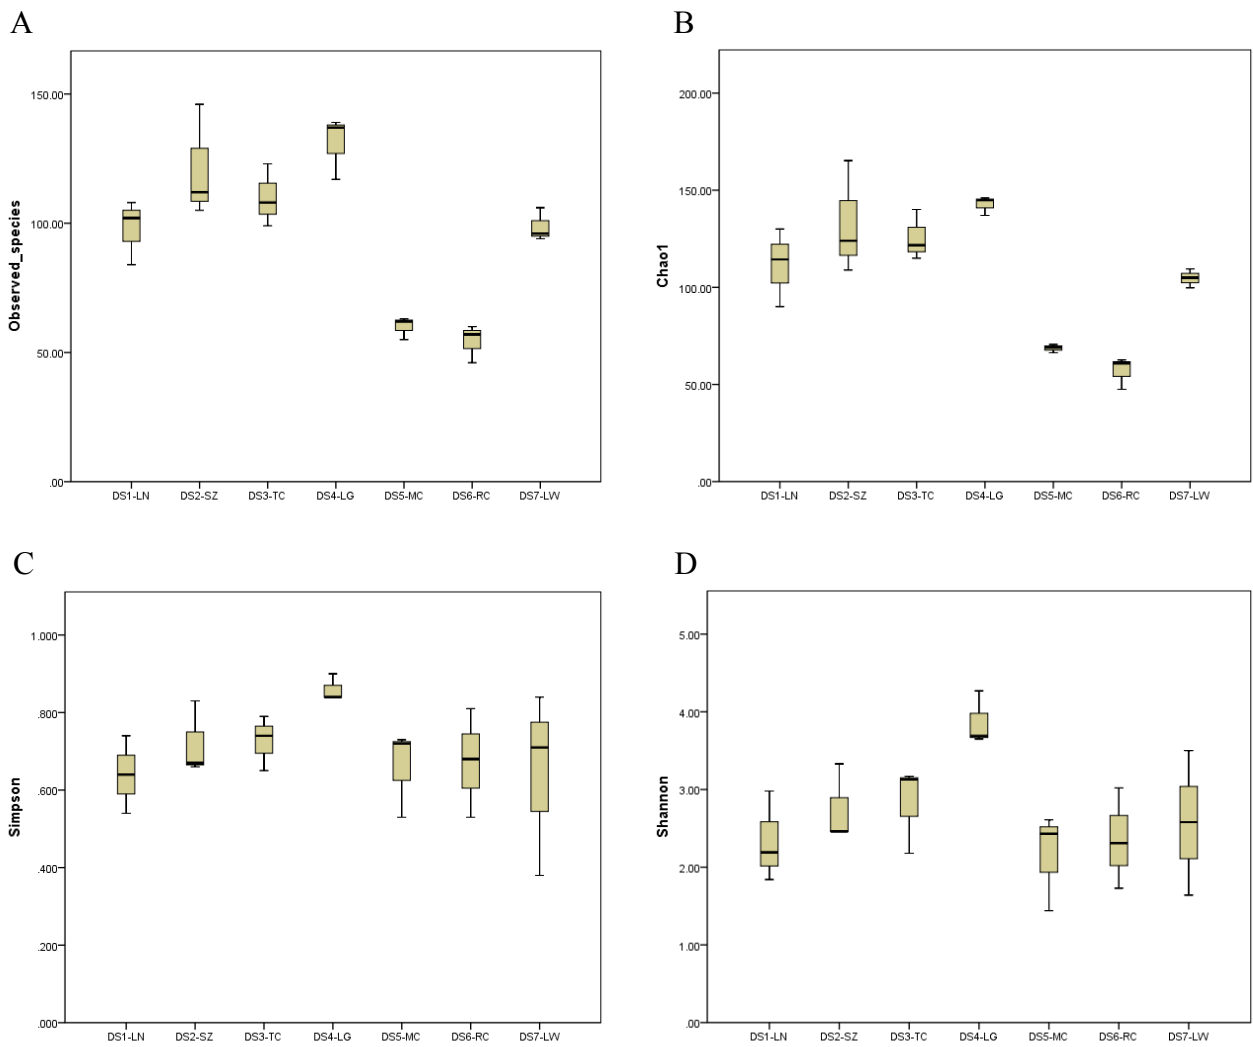

**Figure S7 Fungal community diversity statistics for *S. miltiorrhiza* seed samples.**

(A) Observed species. (B) Chao1 index, which indicated the fungal community richness (expressed as the projected total number of OTU in each sample). (C) Shannon index ( $H'$ ), which is a combined measure of fungal community richness and evenness. (D) Simpson's index, which measures fungal community evenness. Error bars represent the 95% confidence intervals of the data. The observed species, Chao1 and Shannon diversity indicated that fungal community richness showed significant difference between *S.miltiorrhiza* seeds samples from different geographic origins, and fungal community evenness showed by Simpson's index also revealed some significant differences (Table S3 Supporting information).



**Table S1 Sampling sources and quality of *S. miltiorrhiza* seeds.**

| Sample ID | Source                               | Latitude / longitude              | Germination percentage (%) | Thousand kernel weight (g) | Moisture Content (%) | Viability (%) |
|-----------|--------------------------------------|-----------------------------------|----------------------------|----------------------------|----------------------|---------------|
| DS1-LN    | Luonan county, Shaanxi province      | 34°05' 26.19" N, 110°02' 6.09" E  | 86.33±1.20a                | 2.03±0.02a                 | 9.00±0.07b           | 84.00±3.46a   |
| DS2-SZ    | Shangzhou district, Shaanxi province | 33°57' 42.11" N, 109°58' 7.41" E  | 70.00±3.05b                | 1.97±0.02ab                | 7.88±0.01c           | 82.00±6.92a   |
| DS3-TC    | Tongchuan city, Shaanxi province     | 34°54' 15.02" N, 108°57' 5.61" E  | 48.00±6.11c                | 1.87±0.03bc                | 9.64±0.02a           | 57.33±11.56bc |
| DS4-LG    | Langao county, Shaanxi province      | 32°18' 50.68" N, 108°54' 31.81" E | 41.33±7.53cd               | 1.79±0.02c                 | 9.51±0.05ab          | 50.67±13.28bc |
| DS5-MC    | Mianchi county, Henan province       | 34°46' 27.43" N, 111°46' 6.34" E  | 43.67±0.33cd               | 1.67±0.03d                 | 8.89±0.02b           | 40.67±10.97c  |
| DS6-RC    | Ruicheng county, Shanxi province     | 34°38' 11.09" N, 110°19' 8.77" E  | 31.67±4.17d                | 1.81±0.07bc                | 9.33±0.04ab          | 52.67±2.40bc  |
| DS7-LW*   | Laiwu county, Shandong province      | 36°12' 49.00" N, 117°40' 14.86" E | ND                         | ND                         | ND                   | ND            |

Abbreviations: ND – not determined.

\*DS7-LW is a seed of *Salvia miltiorrhiza* Bge. f. *alba*, a variant of *S. miltiorrhiza*.

**Table S2 Characterization of 10 microsatellite loci List.**

| Locus | Primer sequence(5'-3')                              | motif     | Product size(bp) | $T_a$ (°C) | $N_a$ | $H_o$ | $H_E$ | PIC   | Genbank accession no. |
|-------|-----------------------------------------------------|-----------|------------------|------------|-------|-------|-------|-------|-----------------------|
| P017  | F:CAGAGGGAGAAAGGAGAAAT<br>R:GTATGAGCCCAAGTTCAATC    | (AG)6     | 164              | 53         | 7     | 0.703 | 0.701 | 0.638 | KY400593              |
| P018  | F:CTAATGTGTCCAAACCACCT<br>R:TACGGGATGTTTGTCTCC      | (ATT)6    | 157              | 53         | 9     | 0.547 | 0.817 | 0.784 | KY400594              |
| P025  | F:ACGCAAACGTCTCCTTATC<br>R:GTGGAGCTCAGGAATAAGTG     | (TCG)7    | 148              | 54         | 6     | 0.344 | 0.581 | 0.524 | KY400597              |
| P028  | F:GGTTGCAGTGCCATATAGTT<br>R:GTCGTCTCCCATCAACTTC     | (GTT)9    | 145              | 54         | 10    | 0.75  | 0.854 | 0.829 | KY400599              |
| P036  | F:GAGAGTATCGAAACGAGTC<br>R:CATGCATTCTTCACACAGAC     | (AT)9     | 133              | 54         | 8     | 0.531 | 0.726 | 0.684 | KY400604              |
| P040  | F:AAAGATCAGCCACGTATCAC<br>R:ATTATGCTGCACCGATCTAC    | (AAATCA)4 | 132              | 53         | 6     | 0.703 | 0.635 | 0.595 | KY400605              |
| P052  | F:GTCAGTGTTTCAGACATCCTATG<br>R:AACTGAGCCATCAACATCTC | (TGA)9    | 110              | 55         | 8     | 0.594 | 0.695 | 0.654 | KY400612              |
| P074  | F:TACGACAAGCAAGACTACAGC<br>R:ATTACCCAAGCCTCCAAG     | (CAG)7    | 187              | 54         | 6     | 0.5   | 0.536 | 0.499 | KY400620              |

|      |                         |       |     |    |    |       |       |       |          |
|------|-------------------------|-------|-----|----|----|-------|-------|-------|----------|
| P079 | F:GCTGCAGTGGAAGAATATGT  | (GA)9 | 127 | 53 | 11 | 0.547 | 0.832 | 0.809 | KY400623 |
|      | R:TCCATTCCAACATCATCTCTG |       |     |    |    |       |       |       |          |
| P083 | F:GTGATAACGACCAAAGAGGT  | (GA)7 | 100 | 54 | 8  | 0.766 | 0.675 | 0.625 | KY400625 |
|      | R:GCTCTCTCTCGCATCCTTAT  |       |     |    |    |       |       |       |          |

---

$T_a$  Annealing temperature of primer pairs,  $N_a$  number of alleles,  $H_o$  observed heterozygosity,  $H_E$  expected heterozygosity; PIC polymorphism information content

Significant deviations from Hardy–Weinberg equilibrium at  $*P < 0.05$ ,  $**P < 0.01$ , and  $***P < 0.001$ , respectively.

**Table S3 SSR genetic diversity indexes.**

| Cultivar   | $Na^\dagger$ | $Ne^\dagger$ | $I^\dagger$ | $Ho^\dagger$ | $He^\dagger$ | $P^\dagger$ |
|------------|--------------|--------------|-------------|--------------|--------------|-------------|
| TC         | 2.80±0.249   | 2.21±0.153   | 0.86±0.071  | 0.83±0.084   | 0.53±0.031   | 0.34±0.311  |
| SZ         | 2.80±0.200   | 2.37±0.167   | 0.91±0.070  | 0.85±0.076   | 0.56±0.034   | 0.36±0.274  |
| SM         | 3.10±0.379   | 2.49±0.221   | 0.95±0.126  | 0.63±0.125   | 0.55±0.066   | 0.47±0.328  |
| RC         | 4.10±0.379   | 3.28±0.304   | 1.24±0.107  | 0.80±0.050   | 0.66±0.041   | 0.48±0.191  |
| LW         | 2.90±0.233   | 2.32±0.121   | 0.92±0.064  | 0.78±0.079   | 0.56±0.022   | 0.48±0.243  |
| LN         | 2.90±0.277   | 2.39±0.252   | 0.89±0.119  | 0.65±0.100   | 0.53±0.066   | 0.45±0.302  |
| AK         | 3.70±0.335   | 2.63±0.287   | 1.06±0.114  | 0.73±0.079   | 0.57±0.053   | 0.62±0.293  |
| Total Mean | 3.19±0.123   | 2.53±0.090   | 0.98±0.039  | 0.77±0.033   | 0.57±0.018   | 0.46±0.281  |

Mean diversity indexes of the seves studied *Salvia miltiorrhiza* varieties calculated on the SSR dataset.

† mean ± standard error

**Table S4 AMOVA results.**

| Source           | df | SS      | MS    | Est. Var. | %   | <i>P</i> |
|------------------|----|---------|-------|-----------|-----|----------|
| Among cultivars  | 6  | 23.250  | 3.875 | 0.168     | 4%  | <0.001   |
| Within cultivars | 28 | 105.000 | 3.750 | 3.750     | 96% | <0.001   |

Analysis of molecular variance (AMOVA) showing the partitioning of genetic variation within and between varieties (df = degree of freedom, SS = sum of squares, MS mean squares, Est. var. = estimate of variance, % = percentage of total variation, P is based on 9999 permutations)

**Table S5 Summary of sequencing and statistical data of bacterial microbiome of *S. miltiorrhiza* seeds.**

| Sample | Raw Data |        | Valid Data |        | Valid% | Q20%  | Q30%  | GC%   | observed_species | shannon | simpson | chao1  |
|--------|----------|--------|------------|--------|--------|-------|-------|-------|------------------|---------|---------|--------|
|        | Tag      | Base   | Tag        | Base   |        |       |       |       |                  |         |         |        |
| DS1.1  | 30627    | 14.46M | 29721      | 12.22M | 97.04  | 94.89 | 85.07 | 53.18 | 390              | 3.99    | 0.75    | 655.94 |
| DS1.2  | 29203    | 13.78M | 28356      | 11.72M | 97.10  | 94.72 | 84.47 | 54.64 | 519              | 5.22    | 0.91    | 867.43 |
| DS1.3  | 30986    | 14.63M | 30107      | 12.15M | 97.16  | 95.17 | 85.69 | 53.24 | 445              | 4.82    | 0.86    | 643.45 |
| DS2.1  | 36203    | 17.16M | 35684      | 14.58M | 98.57  | 96.68 | 89.74 | 52.84 | 396              | 5.18    | 0.91    | 574.89 |
| DS2.2  | 43953    | 20.83M | 43145      | 17.81M | 98.16  | 96.41 | 89.16 | 54.20 | 447              | 5.1     | 0.87    | 638.11 |
| DS2.3  | 31440    | 14.84M | 30557      | 12.61M | 97.19  | 94.84 | 84.88 | 53.59 | 392              | 4.67    | 0.89    | 687.55 |
| DS3.1  | 25543    | 12.06M | 24755      | 10.35M | 96.92  | 94.28 | 83.53 | 55.05 | 409              | 3.62    | 0.65    | 631.58 |
| DS3.2  | 27233    | 12.85M | 26463      | 11.06M | 97.17  | 94.44 | 83.93 | 54.87 | 392              | 3.62    | 0.69    | 588.91 |
| DS3.3  | 28703    | 13.55M | 27822      | 11.62M | 96.93  | 94.46 | 84.00 | 54.28 | 379              | 3.82    | 0.78    | 621.35 |
| DS4.1  | 30164    | 14.24M | 29192      | 12.02M | 96.78  | 94.66 | 84.47 | 53.25 | 633              | 7.42    | 0.98    | 803.50 |
| DS4.2  | 12151    | 5.76M  | 11632      | 4.81M  | 95.73  | 93.10 | 79.13 | 53.13 | 612              | 6.47    | 0.94    | 877.80 |
| DS4.3  | 49745    | 23.58M | 48933      | 20.24M | 98.37  | 96.28 | 88.72 | 53.23 | 599              | 5.99    | 0.89    | 769.85 |
| DS5.1  | 29720    | 14.03M | 27066      | 11.43M | 91.07  | 91.46 | 77.46 | 55.98 | 320              | 1.95    | 0.36    | 555.17 |
| DS5.2  | 28595    | 13.50M | 27490      | 11.62M | 96.14  | 94.15 | 83.09 | 55.74 | 312              | 4.19    | 0.84    | 408.67 |

|       |       |        |       |        |       |       |       |       |     |      |      |        |
|-------|-------|--------|-------|--------|-------|-------|-------|-------|-----|------|------|--------|
| DS5.3 | 35350 | 16.69M | 33980 | 14.34M | 96.12 | 94.27 | 83.62 | 55.47 | 401 | 4.07 | 0.74 | 611.04 |
| DS6.1 | 27698 | 13.13M | 27116 | 11.40M | 97.90 | 95.73 | 87.39 | 54.70 | 297 | 4.45 | 0.81 | 414.44 |
| DS6.2 | 25133 | 11.91M | 24233 | 10.17M | 96.42 | 95.91 | 87.84 | 55.26 | 256 | 3.33 | 0.64 | 335.60 |
| DS6.3 | 35612 | 16.81M | 34448 | 14.36M | 96.73 | 94.49 | 84.11 | 55.33 | 414 | 4.60 | 0.83 | 638.64 |
| DS7.1 | 43052 | 20.41M | 42344 | 17.49M | 98.36 | 96.43 | 89.15 | 53.6  | 238 | 5.49 | 0.96 | 272.22 |
| DS7.2 | 27948 | 13.19M | 27044 | 11.32M | 96.77 | 94.47 | 84.13 | 53.89 | 278 | 4.39 | 0.83 | 386.90 |
| DS7.3 | 33105 | 15.63M | 32010 | 13.37M | 96.69 | 94.67 | 84.44 | 54.92 | 330 | 5.03 | 0.90 | 418.39 |

---

**Table S6 Summary of sequencing and statistical data of fungal microbiome of *S. miltiorrhiza* seeds.**

| Sample | Raw Data |        | Valid Data |        | Valid% | Q20%  | Q30%  | GC%   | observed_species | shannon | simpson | chao1  |
|--------|----------|--------|------------|--------|--------|-------|-------|-------|------------------|---------|---------|--------|
|        | Tag      | Base   | Tag        | Base   |        |       |       |       |                  |         |         |        |
| DS1.1  | 109371   | 51.62M | 107206     | 25.97M | 98.02  | 99.74 | 98.93 | 51.67 | 108.00           | 2.98    | 0.74    | 130.00 |
| DS1.2  | 82606    | 38.99M | 81800      | 19.81M | 99.02  | 99.78 | 99.04 | 51.31 | 84.00            | 2.19    | 0.64    | 90.07  |
| DS1.3  | 86351    | 40.76M | 84486      | 20.18M | 97.84  | 99.79 | 99.12 | 51.74 | 102.00           | 1.84    | 0.54    | 114.36 |
| DS2.1  | 74134    | 35.14M | 73428      | 17.54M | 99.05  | 99.82 | 99.29 | 53.59 | 105.00           | 2.46    | 0.66    | 108.93 |
| DS2.2  | 78038    | 36.99M | 77144      | 18.73M | 98.85  | 99.72 | 99.02 | 56.91 | 146.00           | 3.33    | 0.83    | 165.25 |
| DS2.3  | 90553    | 42.74M | 90231      | 21.48M | 99.64  | 99.73 | 98.96 | 56.70 | 112.00           | 2.46    | 0.67    | 124.00 |
| DS3.1  | 60322    | 28.47M | 58653      | 14.77M | 97.23  | 99.46 | 98.13 | 57.41 | 123.00           | 3.13    | 0.79    | 140.10 |
| DS3.2  | 93459    | 44.30M | 93243      | 23.12M | 99.77  | 99.69 | 98.92 | 53.40 | 108.00           | 3.17    | 0.74    | 115.00 |
| DS3.3  | 75824    | 35.79M | 75343      | 19.46M | 99.37  | 99.42 | 98.04 | 57.91 | 99.00            | 2.18    | 0.65    | 121.67 |
| DS4.1  | 98566    | 46.52M | 96057      | 23.62M | 97.45  | 99.59 | 98.54 | 60.21 | 117.00           | 3.69    | 0.84    | 137.00 |
| DS4.2  | 89719    | 42.53M | 87938      | 21.04M | 98.01  | 99.75 | 99.12 | 55.97 | 137.00           | 4.27    | 0.90    | 144.86 |
| DS4.3  | 81017    | 38.40M | 80607      | 19.55M | 99.49  | 99.73 | 99.02 | 56.83 | 139.00           | 3.65    | 0.84    | 146.00 |
| DS5.1  | 49827    | 23.52M | 49796      | 12.79M | 99.94  | 98.23 | 94.06 | 50.57 | 62.00            | 2.43    | 0.73    | 69.00  |
| DS5.2  | 70388    | 33.22M | 67527      | 16.62M | 95.94  | 99.67 | 98.70 | 51.64 | 63.00            | 2.61    | 0.72    | 66.33  |
| DS5.3  | 76073    | 35.91M | 75474      | 18.41M | 99.21  | 99.73 | 98.88 | 52.24 | 55.00            | 1.44    | 0.53    | 70.60  |
| DS6.1  | 129523   | 61.39M | 106958     | 28.12M | 82.58  | 99.29 | 97.87 | 53.91 | 60.00            | 3.02    | 0.81    | 60.86  |
| DS6.2  | 70922    | 33.48M | 63684      | 15.59M | 89.79  | 99.66 | 98.76 | 52.56 | 57.00            | 2.31    | 0.68    | 62.60  |
| DS6.3  | 71557    | 33.77M | 58418      | 14.30M | 81.64  | 99.68 | 98.82 | 52.08 | 46.00            | 1.73    | 0.53    | 47.50  |
| DS7.1  | 94304    | 44.70M | 92766      | 22.52M | 98.37  | 99.70 | 98.95 | 54.98 | 96.00            | 3.50    | 0.84    | 99.75  |
| DS7.2  | 77144    | 36.41M | 75668      | 18.37M | 98.09  | 99.68 | 98.79 | 54.14 | 94.00            | 2.58    | 0.71    | 105.00 |
| DS7.3  | 69423    | 32.77M | 69050      | 17.18M | 99.46  | 99.62 | 98.56 | 51.53 | 106.00           | 1.64    | 0.38    | 109.46 |



**Table S7 Alpha-diversity and richness estimates indices for bacterial 16S rDNA amplicon libraries of *S. miltiorrhiza* seed samples.**

| Sample ID | observed_species | shannon     | simpson     | chao1           | Coverage, %  |
|-----------|------------------|-------------|-------------|-----------------|--------------|
| DS1-LN    | 451.33±64.73b    | 4.67±0.63bc | 0.64±0.10b  | 722.27±125.86ab | 62.83±5.52b  |
| DS2-SZ    | 411.67±30.66bc   | 4.98±0.27b  | 0.72±0.10ab | 633.52±56.47bc  | 65.33±7.24b  |
| DS3-TC    | 393.33±15.04bc   | 3.69±0.12c  | 0.73±0.07ab | 613.95±22.28bc  | 64.13±2.86b  |
| DS4-LG    | 614.67±17.16a    | 6.63±0.73a  | 0.86±0.03a  | 817.05±55.24a   | 75.43±4.99ab |
| DS5-MC    | 344.33±49.24c    | 3.40±1.26c  | 0.66±0.11b  | 524.96±104.51bc | 66.50±9.38b  |
| DS6-RC    | 322.33±81.99c    | 4.13±0.69bc | 0.67±0.14b  | 462.89±157.22c  | 70.93±5.79ab |
| DS7-LW    | 282.00±46.13c    | 4.97±0.55b  | 0.90±0.07a  | 359.17±76.93c   | 79.40±7.76a  |

**Table S8 Alpha-diversity and Richness estimates indices for Fungal ITS amplicon libraries of *S. miltiorrhiza* seed samples.**

| Sample ID | observed_species | shannon    | simpson     | chao1          | Coverage, % |
|-----------|------------------|------------|-------------|----------------|-------------|
| DS1-LN    | 98.00±12.19b     | 2.34±0.58b | 0.64±0.10b  | 111.48±20.12b  | 88.53±5.13a |
| DS2-SZ    | 121.00±21.93a    | 2.75±0.50b | 0.72±0.10ab | 132.73±19.16ab | 91.70±4.18a |
| DS3-TC    | 110.00±12.12ab   | 2.82±0.56b | 0.72±0.07ab | 125.59±13.00ab | 87.70±6.25a |
| DS4-LG    | 131.00±12.16a    | 3.87±0.35a | 0.86±0.03a  | 142.62±4.90a   | 91.73±5.49a |
| DS5-MC    | 60.00±4.36c      | 2.16±0.63c | 0.66±0.11b  | 68.64±2.16c    | 87.60±8.78a |
| DS6-RC    | 54.33±7.37c      | 2.35±0.65c | 0.67±0.14b  | 56.99±8.26c    | 95.50±3.92a |
| DS7-LW    | 98.66±6.43b      | 2.57±0.93b | 0.64±0.24b  | 104.74±4.86b   | 94.17±4.05a |

**Table S9 Top 8 most abundant bacterial genera within core bacterial microbiome of *S. miltiorrhiza* seed\*.**

| <b>Genus ID</b> | <b>Taxonomy</b>                                                                                                              | <b>Relative abundance, %</b> |
|-----------------|------------------------------------------------------------------------------------------------------------------------------|------------------------------|
| 1               | d__Bacteria; p__Proteobacteria; c__Gammaproteobacteria; o__Enterobacteriales; f__Enterobacteriaceae; g__ <i>Pantoea</i>      | 68%                          |
| 2               | d__Bacteria; p__Proteobacteria; c__Gammaproteobacteria; o__Pseudomonadales; f__Pseudomonadaceae; g__ <i>Pseudomonas</i>      | 22%                          |
| 3               | d__Bacteria; p__Proteobacteria; c__Gammaproteobacteria; o__Enterobacteriales; f__Enterobacteriaceae; g__ <i>Enterobacter</i> | 3%                           |
| 4               | d__Bacteria; p__Proteobacteria; c__Gammaproteobacteria; o__Enterobacteriales; f__Enterobacteriaceae; g__unclassified         | 2%                           |
| 5               | d__Bacteria; p__Proteobacteria; c__Alphaproteobacteria; o__Sphingomonadales; f__Sphingomonadaceae; g__ <i>Sphingomonas</i>   | 1%                           |
| 6               | d__Bacteria; p__Proteobacteria; c__Alphaproteobacteria; o__Rhizobiales; f__Methylobacteriaceae; g__ <i>Methylobacterium</i>  | 1%                           |
| 7               | d__Bacteria; p__Actinobacteria; c__Actinobacteria; o__Actinomycetales; f__Microbacteriaceae; g__ <i>Curtobacterium</i>       | 1%                           |
| 8               | d__Bacteria; p__Proteobacteria; c__Gammaproteobacteria; o__Enterobacteriales; f__Enterobacteriaceae; g__ <i>Erwinia</i>      | 1%                           |

\*abundant bacterial genus means relative abundance great than 1%.

**Table S10 Top 8 most abundant fungal genera within core fungal microbiome of *S. miltiorrhiza* seed\*.**

| Genus ID | Taxonomy                                                                                                       | Relative abundance, % |
|----------|----------------------------------------------------------------------------------------------------------------|-----------------------|
| 1        | d__Fungi; p__Ascomycota; c__Dothideomycetes; o__Pleosporales; f__Pleosporaceae; g__ <i>Alternaria</i>          | 54%                   |
| 2        | d__Fungi; p__Ascomycota; c__Dothideomycetes; o__Capnodiales; f__Davidiellaceae; g__unclassified                | 28%                   |
| 3        | d__Fungi; p__Ascomycota; c__Dothideomycetes; o__Pleosporales; f__unclassified; g__unclassified                 | 9%                    |
| 4        | d__Fungi; p__Ascomycota; c__Leotiomycetes; o__Helotiales; f__Sclerotiniaceae; g__Sclerotiniaceae_unidentified  | 3%                    |
| 5        | d__Fungi; p__Ascomycota; c__Dothideomycetes; o__Dothideales; f__Dothioraceae; g__ <i>Aureobasidium</i>         | 2%                    |
| 6        | d__Fungi; p__Basidiomycota; c__Tremellomycetes; o__Filobasidiales; f__Filobasidiaceae; g__ <i>Filobasidium</i> | 2%                    |
| 7        | d__Fungi; p__Ascomycota; c__unclassified; o__unclassified; f__unclassified; g__unclassified                    | about 2%              |
| 8        | d__Fungi; p__unclassified; c__unclassified; o__unclassified; f__unclassified; g__unclassified                  |                       |

\*abundant bacterial genus means relative abundance great than 1%.
